# Supplementary material
Source: PubMed Central journal article supplement (PMC2238161)
Supplement: eukcell_7_2_387__1.pdf [file eukcell_7_2_387__1.pdf]

**Supplemental Table 1. Gene Expression Responses to Sampangine in *S. cerevisiae***

| <b>ORF</b> | <b>Gene symbol</b> | <b>Description</b>                                                                                                                                                                                                              | <b>Fold Change</b> |
|------------|--------------------|---------------------------------------------------------------------------------------------------------------------------------------------------------------------------------------------------------------------------------|--------------------|
| YJR150C    | DAN1               | cell wall mannoprotein induced during anaerobic growth                                                                                                                                                                          | 67.5               |
| YLR460C    |                    | Hypothetical ORF                                                                                                                                                                                                                | 37.0               |
| YCR102C    |                    | Putative protein of unknown function; involved in copper metabolism; similar to <i>C.carbonum</i> toxD gene                                                                                                                     | 17.6               |
| YKL086W    | SRX1               | ATP-dependent cysteine sulfinic acid reductase                                                                                                                                                                                  | 15.1               |
| YOL101C    | IZH4               | Membrane protein involved in zinc metabolism, member of the four-protein IZH family, expression induced by fatty acids and altered zinc levels; deletion reduces sensitivity to excess zinc; possible role in sterol metabolism | 14.4               |
| YOR237W    | HES1               | similar to human oxysterol binding protein                                                                                                                                                                                      | 11.4               |
| YER011W    | TIR1               | Cold-shock induced protein of the Srp1p/Tip1p family of serine-alanine-rich proteins. Encodes a stress-response cell wall mannoprotein and this gene is downregulated at acidic pH.                                             | 9.9                |
| YAR068W    |                    | putative membrane protein                                                                                                                                                                                                       | 9.7                |
| YNL134C    |                    | Putative protein of unknown function with similarity to dehydrogenases from other model organisms; green fluorescent protein (GFP)-fusion protein localizes to the cytoplasm and nucleus                                        | 9.3                |
| YFL057C    | AAD4               | aryl-alcohol dehydrogenase (putative)                                                                                                                                                                                           | 6.7                |
| YJR047C    | ANB1               | translation initiation factor eIF-5A, anaerobically expressed form                                                                                                                                                              | 6.2                |
| YHR211W    | FLO5               | Lectin-like protein involved in flocculation, cell wall protein that binds to mannose chains on the surface of other cells, confers floc-forming ability that is chymotrypsin resistant but heat labile; similar to Flo1p       | 6.2                |
| YOL151W    | GRE2               | NADPH-dependent methylglyoxal reductase (D-lactaldehyde dehydrogenase); stress induced (osmotic, ionic, oxidative, heat shock and heavy metals); regulated by the HOG pathway                                                   | 6.0                |
| YOR011W    | AUS1               | ATP-binding cassette (ABC) family                                                                                                                                                                                               | 5.6                |
| YDR044W    | HEM13              | coproporphyrinogen III oxidase                                                                                                                                                                                                  | 5.6                |
| YML058w-a  | HUG1               | Protein involved in the Mec1p-mediated checkpoint pathway that responds to DNA damage or replication arrest, transcription is induced by DNA damage                                                                             | 5.2                |
| YBR244W    | GPX2               | Phospholipid hydroperoxide glutathione peroxidase induced by glucose starvation that protects cells from phospholipid hydroperoxides and nonphospholipid peroxides during oxidative stress                                      | 5.1                |
| YOL161C    | PAU20              | Hypothetical protein                                                                                                                                                                                                            | 5.0                |
| YNR073C    |                    | Hypothetical ORF                                                                                                                                                                                                                | 4.8                |
| YOR153W    | PDR5               | multidrug resistance transporter                                                                                                                                                                                                | 4.7                |
| YIL176C    | PAU14              | Hypothetical protein                                                                                                                                                                                                            | 4.7                |
| YAR066W    |                    | putative membrane protein                                                                                                                                                                                                       | 4.6                |

|         |       |                                                                                                                                                                                                              |     |
|---------|-------|--------------------------------------------------------------------------------------------------------------------------------------------------------------------------------------------------------------|-----|
| YFL056C | AAD6  | aryl-alcohol dehydrogenase (putative)                                                                                                                                                                        | 4.6 |
| YLL064C | PAU18 | Hypothetical protein                                                                                                                                                                                         | 4.4 |
| YLL060C | GTT2  | glutathione transferase                                                                                                                                                                                      | 4.3 |
| YJL223C | PAU1  | Part of 23-member seripauperin multigene family encoded mainly in subtelomeric regions, active during alcoholic fermentation, regulated by anaerobiosis, negatively regulated by oxygen, repressed by heme   | 4.3 |
| YDR046C | BAP3  | valine transporter                                                                                                                                                                                           | 4.2 |
| YHR048W | YHK8  | Putative protein of unknown function, has similarity to multidrug resistance proteins; expression of gene is up-regulated in cells exhibiting reduced susceptibility to azoles                               | 4.0 |
| YNR075W | COS10 | Protein of unknown function, member of a family of conserved, often subtelomerically-encoded proteins                                                                                                        | 4.0 |
| YKR066C | CCP1  | cytochrome c peroxidase                                                                                                                                                                                      | 3.9 |
| YJR149W |       | Putative protein of unknown function; green fluorescent protein (GFP)-fusion protein localizes to the cytoplasm                                                                                              | 3.9 |
| YDR275W | BSC2  | Transcript encoded by this ORF shows a high level of stop codon bypass                                                                                                                                       | 3.8 |
| YLR297W |       | Putative protein of unknown function; green fluorescent protein (GFP)-fusion protein localizes to the vacuole; YLR297W is not an essential gene                                                              | 3.7 |
| YLL025W | DAN2  | Hypothetical ORF /// putative cell wall protein                                                                                                                                                              | 3.7 |
| YML131W |       | Putative protein of unknown function with similarity to oxidoreductases; mRNA expression is increased in a HOG1 and SKO1-dependent manner after osmotic shock; GFP-fusion protein localizes to the cytoplasm | 3.6 |
| YJL213W |       | Protein of unknown function that may interact with ribosomes; periodically expressed during the yeast metabolic cycle; phosphorylated in vitro by the mitotic exit network (MEN) kinase complex, Dbf2p/Mob1p | 3.6 |
| YBR085W | AAC3  | ADP/ATP translocator                                                                                                                                                                                         | 3.5 |
| YBL075C | SSA3  | heat shock protein of HSP70 family                                                                                                                                                                           | 3.5 |
| YLR413W |       | Protein of unknown function; green fluorescent protein (GFP)-fusion protein localizes to the cell periphery                                                                                                  | 3.5 |
| YNR076W | PAU6  | Part of 23-member seripauperin multigene family encoded mainly in subtelomeric regions, active during alcoholic fermentation, regulated by anaerobiosis, negatively regulated by oxygen, repressed by heme   | 3.5 |
| YLR461W | PAU4  | Part of 23-member seripauperin multigene family encoded mainly in subtelomeric regions, active during alcoholic fermentation, regulated by anaerobiosis, negatively regulated by oxygen, repressed by heme   | 3.4 |
| YJR156C | THI12 | Protein involved in synthesis of the thiamine precursor hydroxymethylpyrimidine (HMP); member of a subtelomeric gene family including THI5, THI11, THI12, and THI13                                          | 3.2 |
| YPR009W | SUT2  | Involved in sterol uptake; homologous to SUT1                                                                                                                                                                | 3.2 |
| YGR035C |       | Protein of unknown function, potential Cdc28p substrate; transcription is activated by paralogous transcription factors Yrm1p and Yrr1p along with genes involved in multidrug resistance                    | 3.2 |

|         |       |                                                                                                                                                                                                                                                             |     |
|---------|-------|-------------------------------------------------------------------------------------------------------------------------------------------------------------------------------------------------------------------------------------------------------------|-----|
| YDL020C | RPN4  | Transcription factor that stimulates expression of proteasome genes; Rpn4p levels are in turn regulated by the 26S proteasome in a negative feedback control mechanism; RPN4 is transcriptionally regulated by various stress responses                     | 3.2 |
| YPR071W |       | Hypothetical ORF                                                                                                                                                                                                                                            | 3.1 |
| YKL071W |       | Putative protein of unknown function; green fluorescent protein (GFP)-fusion protein localizes to the cytoplasm                                                                                                                                             | 3.1 |
| YJR124C |       | Hypothetical ORF                                                                                                                                                                                                                                            | 3.1 |
| YAL062W | GDH3  | NADP-linked glutamate dehydrogenase                                                                                                                                                                                                                         | 3.0 |
| YDR533C | HSP31 | Possible chaperone and cysteine protease with similarity to <i>E. coli</i> Hsp31 and <i>S. cerevisiae</i> Hsp32p, Hsp33p, and Sno4p; member of the DJ-1/ThiJ/PfpI superfamily, which includes human DJ-1 involved in Parkinson's disease; exists as a dimer | 3.0 |
| YBR284W |       | Putative protein of unknown function; YBR284W is not an essential gene; null mutant exhibits decreased resistance to rapamycin and wortmannin                                                                                                               | 3.0 |
| YOR009W | TIR4  | cell wall mannoprotein                                                                                                                                                                                                                                      | 3.0 |
| YBR092C | PHO3  | acid phosphatase                                                                                                                                                                                                                                            | 3.0 |
| YOR226C | ISU2  | Iron-sulfur cluster nifU-like protein                                                                                                                                                                                                                       | 3.0 |
| YGL075C | MPS2  | Essential membrane protein localized at the nuclear envelope and spindle pole body (SPB), required for insertion of the newly duplicated SPB into the nuclear envelope; potentially phosphorylated by Cdc28p                                                | 2.9 |
| YOL002C | IZH2  | Membrane protein involved in zinc metabolism, member of the four-protein IZH family, direct target of the Zap1p transcription factor, expression induced by zinc deficiency and fatty acids, deletion increases sensitivity to elevated zinc                | 2.9 |
| YPL257W |       | Hypothetical ORF                                                                                                                                                                                                                                            | 2.9 |
| YGR177C | ATF2  | alcohol acetyltransferase                                                                                                                                                                                                                                   | 2.9 |
| YDR472W | TRS31 | targeting complex (TRAPP) component involved in ER to Golgi membrane traffic                                                                                                                                                                                | 2.9 |
| YCR104W | PAU3  | Part of 23-member seripauperin multigene family encoded mainly in subtelomeric regions, active during alcoholic fermentation, regulated by anaerobiosis, negatively regulated by oxygen, repressed by heme                                                  | 2.9 |
| YGL039W |       | Oxidoreductase, catalyzes NADPH-dependent reduction of the bicyclic diketone bicyclo[2.2.2]octane-2,6-dione (BCO <sub>2,6D</sub> ) to the chiral ketoalcohol (1R,4S,6S)-6-hydroxybicyclo[2.2.2]octane-2-one (BCO <sub>2one6ol</sub> )                       | 2.9 |
| YGR213C | RTA1  | involved in 7-amincholesterol resistance                                                                                                                                                                                                                    | 2.8 |
| YLR099C | ICT1  | Protein of unknown function, null mutation leads to an increase in sensitivity to Calcofluor white; expression of the gene is induced in the presence of isooctane                                                                                          | 2.8 |
| YGL209W | MIG2  | contains zinc fingers very similar to zinc fingers in Mig1p                                                                                                                                                                                                 | 2.8 |
| YKL125W | RRN3  | DNA independent RNA polymerase I transcription factor                                                                                                                                                                                                       | 2.8 |

|           |       |                                                                                                                                                                                                            |     |
|-----------|-------|------------------------------------------------------------------------------------------------------------------------------------------------------------------------------------------------------------|-----|
| YGL261C   | PAU11 | Putative protein of unknown function; mRNA expression appears to be regulated by SUT1 and UPC2                                                                                                             | 2.7 |
| YDR453C   | TSA2  | thioredoxin-peroxidase (TPx); reduces H <sub>2</sub> O <sub>2</sub> and alkyl hydroperoxides with the use of hydrogens provided by thioredoxin, thioredoxin reductase, and NADPH                           | 2.7 |
| YDR213W   | UPC2  | zinc finger transcription factor of the Zn(2)-Cys(6) binuclear cluster domain type                                                                                                                         | 2.7 |
| YKL051W   | SFK1  | Suppressor of PI Four Kinase                                                                                                                                                                               | 2.7 |
| YCR087C-A | LUG1  | Putative protein of unknown function; green fluorescent protein (GFP)-fusion protein localizes to the nucleolus                                                                                            | 2.7 |
| YOR377W   | ATF1  | alcohol acetyltransferase                                                                                                                                                                                  | 2.7 |
| YMR325W   | PAU19 | Hypothetical protein                                                                                                                                                                                       | 2.6 |
| YDR542W   | PAU10 | Hypothetical protein                                                                                                                                                                                       | 2.6 |
| YER188c-a |       | Putative protein of unknown function                                                                                                                                                                       | 2.6 |
| YKL224C   | PAU16 | Putative protein of unknown function                                                                                                                                                                       | 2.6 |
| YER064C   |       | Non-essential nuclear protein; null mutation has global effects on transcription                                                                                                                           | 2.6 |
| YAR020C   | PAU7  | Part of 23-member seripauperin multigene family encoded mainly in subtelomeric regions, active during alcoholic fermentation, regulated by anaerobiosis, negatively regulated by oxygen, repressed by heme | 2.6 |
| YDR256C   | CTA1  | catalase A                                                                                                                                                                                                 | 2.6 |
| YBL064C   | PRX1  | Mitochondrial peroxiredoxin (1-Cys Prx) with thioredoxin peroxidase activity, has a role in reduction of hydroperoxides; induced during respiratory growth and under conditions of oxidative stress        | 2.6 |
| YKR050W   | TRK2  | low affinity potassium transport membrane protein                                                                                                                                                          | 2.5 |
| YJR151C   | DAN4  | cell wall mannoprotein                                                                                                                                                                                     | 2.5 |
| YIL011W   | TIR3  | cell wall mannoprotein                                                                                                                                                                                     | 2.5 |
| YOR262W   |       | Cytoplasmic protein of unknown function; essential gene with similarity to YLR243W; contains an ATP/GTP binding site motif                                                                                 | 2.5 |
| YKL106W   | AAT1  | aspartate aminotransferase                                                                                                                                                                                 | 2.5 |
| YGL259W   | YPS5  | GPI-anchored aspartic protease                                                                                                                                                                             | 2.5 |
| YJR116W   |       | Putative protein of unknown function                                                                                                                                                                       | 2.5 |
| YAR069C   |       | Identified by gene-trapping, microarray-based expression analysis, and genome-wide homology searching                                                                                                      | 2.5 |
| YBR301W   | DAN3  | Cell wall mannoprotein with similarity to Tir1p, Tir2p, Tir3p, and Tir4p; expressed under anaerobic conditions, completely repressed during aerobic growth                                                 | 2.5 |
| YPL189W   | GUP2  | active glycerol transporter (putative)                                                                                                                                                                     | 2.5 |
| YIL066C   | RNR3  | ribonucleotide reductase, large (R1) subunit                                                                                                                                                               | 2.5 |
| YDR240C   | SNU56 | U1 snRNP protein                                                                                                                                                                                           | 2.5 |

|           |       |                                                                                                                                                                |     |
|-----------|-------|----------------------------------------------------------------------------------------------------------------------------------------------------------------|-----|
| YJL082W   | IML2  | Protein of unknown function, green fluorescent protein (GFP)-fusion protein localizes to the cytoplasm and nucleus                                             | 2.5 |
| YNR071C   |       | Hypothetical ORF                                                                                                                                               | 2.4 |
| YLL056C   |       | Protein of unknown function, transcription is activated by paralogous transcription factors Yrm1p and Yrr1p along with genes involved in multidrug resistance  | 2.4 |
| YGR131W   |       | Hypothetical ORF                                                                                                                                               | 2.4 |
| YKL047W   |       | Putative protein of unknown function; green fluorescent protein (GFP)-fusion protein localizes to the cytoplasm                                                | 2.4 |
| YGR294W   | PAU12 | Hypothetical protein                                                                                                                                           | 2.4 |
| YCR020C   | PET18 | Protein required for respiratory growth and stability of the mitochondrial genome                                                                              | 2.4 |
| YOR028C   | CIN5  | bZIP (basic-leucine zipper) protein can activate transcription from a promoter containing a Yap recognition site                                               | 2.4 |
| YKL162C-A |       | Similar to PIR1, PIR2 and PIR3 proteins                                                                                                                        | 2.4 |
| YPR134W   | MSS18 | Protein involved in splicing intron a15beta of COX1                                                                                                            | 2.4 |
| YFL050C   | ALR2  | Probable Mg(2+) transporter; overexpression confers increased tolerance to Al(3+) and Ga(3+) ions                                                              | 2.4 |
| YLR437C   |       | Putative protein of unknown function; epitope tagged protein localizes to the cytoplasm                                                                        | 2.4 |
| YOR106W   | VAM3  | syntaxin family                                                                                                                                                | 2.3 |
| YDL024C   | DIA3  | Protein of unknown function, involved in invasive and pseudohyphal growth                                                                                      | 2.3 |
| YJL116C   | NCA3  | With NCA2, regulates proper expression of subunits 6 (Atp6p) and 8 (Atp8p ) of the Fo-F1 ATP synthase                                                          | 2.3 |
| YGL162W   | SUT1  | Involved in sterol uptake                                                                                                                                      | 2.3 |
| YNL024C   |       | Putative protein of unknown function with seven beta-strand methyltransferase motif; green fluorescent protein (GFP)-fusion protein localizes to the cytoplasm | 2.3 |
| YDR032C   | PST2  | Protoplasts-Secreted protein; the gene product was detected among the proteins secreted by regenerating protoplasts                                            | 2.3 |
| YOR162C   | YRR1  | transcription factor                                                                                                                                           | 2.3 |
| YLR077W   |       | The authentic, non-tagged protein was localized to the mitochondria                                                                                            | 2.3 |
| YJR056C   |       | Hypothetical ORF                                                                                                                                               | 2.3 |
| YKR052C   | MRS4  | carrier protein                                                                                                                                                | 2.2 |
| YLL011W   | SOF1  | U3 snoRNP protein                                                                                                                                              | 2.2 |
| YGR281W   | YOR1  | ABC transporter                                                                                                                                                | 2.2 |
| YOR175C   |       | Member of the MBOAT family of putative membrane-bound O-acyltransferases                                                                                       | 2.2 |
| YAL059W   | ECM1  | Protein of unknown function, localized in the nucleoplasm and the nucleolus, genetically interacts with MTR2 in 60S ribosomal protein subunit export           | 2.2 |

|         |       |                                                                                                                                                                                                                               |      |
|---------|-------|-------------------------------------------------------------------------------------------------------------------------------------------------------------------------------------------------------------------------------|------|
| YGR168C |       | Putative protein of unknown function                                                                                                                                                                                          | 2.2  |
| YJL035C | TAD2  | tRNA-specific adenosine deaminase subunit                                                                                                                                                                                     | 2.2  |
| YFR012W |       | Hypothetical ORF                                                                                                                                                                                                              | 2.1  |
| YLR247C | IRC20 | Putative helicase; localized to mitochondria and the nucleus; YLR247C is not an essential gene; null mutant displays increased levels of spontaneous Rad52 foci                                                               | 2.1  |
| YJR097W | JJJ3  | Protein that may function as a cochaperone, as suggested by the presence of a DnaJ-like domain                                                                                                                                | 2.1  |
| YBR119W | MUD1  | U1 snRNP A protein                                                                                                                                                                                                            | 2.1  |
| YAR029W |       | Member of DUP240 gene family but contains no transmembrane domains; green fluorescent protein (GFP)-fusion protein localizes to the cytoplasm in a punctate pattern                                                           | 2.1  |
| YKR086W | PRP16 | ATP-binding protein (putative)                                                                                                                                                                                                | 2.1  |
| YKL219W | COS9  | Protein of unknown function, member of a family of conserved, often subtelomerically-encoded proteins                                                                                                                         | 2.0  |
| YML043C | RRN11 | rDNA transcription factor component                                                                                                                                                                                           | 2.0  |
| YLR108C |       | Protein of unknown function; green fluorescent protein (GFP)-fusion protein localizes to the nucleus                                                                                                                          | 2.0  |
| YCR048W | ARE1  | acyl-CoA cholesterol acyltransferase (sterol-ester synthetase)                                                                                                                                                                | 2.0  |
| YDL137W | ARF2  | ADP-ribosylation factor 2                                                                                                                                                                                                     | -2.0 |
| YER170W | ADK2  | adenylate kinase mitochondrial GTP:AMP phosphotransferase                                                                                                                                                                     | -2.0 |
| YMR210W |       | Putative acyltransferase with similarity to Eeb1p and Eht1p, has a minor role in medium-chain fatty acid ethyl ester biosynthesis; may be involved in lipid metabolism and detoxification                                     | -2.0 |
| YMR002W | MIC17 | Mitochondrial intermembrane space cysteine motif protein; MIC17 is not an essential gene                                                                                                                                      | -2.0 |
| YER175C | TMT1  | Trans-aconitate Methyltransferase 1                                                                                                                                                                                           | -2.1 |
| YJL167W | ERG20 | farnesyl diphosphate synthetase (FPP synthetase)                                                                                                                                                                              | -2.1 |
| YIL155C | GUT2  | glycerol-3-phosphate dehydrogenase                                                                                                                                                                                            | -2.1 |
| YLR214W | FRE1  | cupric reductase ferric reductase                                                                                                                                                                                             | -2.2 |
| YML120C | NDI1  | NADH dehydrogenase (ubiquinone)                                                                                                                                                                                               | -2.2 |
| YER024W | YAT2  | carnitine acetyltransferase                                                                                                                                                                                                   | -2.2 |
| YER141W | COX15 | cytochrome oxidase assembly factor                                                                                                                                                                                            | -2.2 |
| YKL151C |       | Putative protein of unknown function; green fluorescent protein (GFP)-fusion protein localizes to the cytoplasm                                                                                                               | -2.2 |
| YBR230C | OM14  | Integral mitochondrial outer membrane protein; abundance is decreased in cells grown in glucose relative to other carbon sources; appears to contain 3 alpha-helical transmembrane segments; ORF encodes a 97-basepair intron | -2.3 |

|           |       |                                                                                                                                                                                           |      |
|-----------|-------|-------------------------------------------------------------------------------------------------------------------------------------------------------------------------------------------|------|
| YJR025C   | BNA1  | 3-hydroxyanthranilic acid dioxygenase                                                                                                                                                     | -2.3 |
| YPL081W   | RPS9A | ribosomal protein S9A (S13) (rp21) (YS11)                                                                                                                                                 | -2.3 |
| YBR050C   | REG2  | Glc7p regulatory subunit                                                                                                                                                                  | -2.3 |
| YOL083W   |       | Hypothetical ORF                                                                                                                                                                          | -2.3 |
| YHR216W   | IMD2  | IMP dehydrogenase homolog                                                                                                                                                                 | -2.3 |
| YGR032W   | GSC2  | 1,3-beta-D-glucan synthase catalytic component                                                                                                                                            | -2.3 |
| YHR051W   | COX6  | cytochrome c oxidase subunit                                                                                                                                                              | -2.3 |
| YOL158C   | ENB1  | enterobactin transporter                                                                                                                                                                  | -2.4 |
| YKL150W   | MCR1  | NADH-cytochrome b5 reductase                                                                                                                                                              | -2.4 |
| YIL111W   | COX5B | cytochrome c oxidase chain Vb                                                                                                                                                             | -2.4 |
| YHR092C   | HXT4  | high affinity glucose transporter                                                                                                                                                         | -2.5 |
| YLR038C   | COX12 | cytochrome c oxidase subunit VIb                                                                                                                                                          | -2.5 |
| YOR375C   | GDH1  | NADP-specific glutamate dehydrogenase                                                                                                                                                     | -2.5 |
| YOR215C   |       | Putative protein of unknown function; the authentic, non-tagged protein is detected in highly purified mitochondria in high-throughput studies                                            | -2.5 |
| YDL130W-A | STF1  | ATPase stabilizing factor                                                                                                                                                                 | -2.6 |
| YNR060W   | FRE4  | Ferric reductase, reduces a specific subset of siderophore-bound iron prior to uptake by transporters; expression induced by low iron levels                                              | -2.6 |
| YBR294W   | SUL1  | sulfate uptake is mediated by specific sulfate transporters SUL1 and SUL2, which control the concentration of endogenous activated sulfate intermediates.                                 | -2.6 |
| YOR185C   | GSP2  | GTP-binding protein Gsp1p homolog                                                                                                                                                         | -2.6 |
| YER044C   | ERG28 | Endoplasmic reticulum membrane protein, may facilitate protein-protein interactions between the Erg26p dehydrogenase and the Erg27p 3-ketoreductase and/or tether these enzymes to the ER | -2.6 |
| YDR529C   | QCR7  | ubiquinol cytochrome C oxidoreductase subunit 7 (14 kDa)                                                                                                                                  | -2.6 |
| YOR384W   | FRE5  | Putative ferric reductase with similarity to Fre2p; expression induced by low iron levels                                                                                                 | -2.7 |
| YDL110C   | TMA17 | Protein of unknown function that associates with ribosomes                                                                                                                                | -2.8 |
| YDL174C   | DLD1  | D-lactate ferricytochrome c oxidoreductase                                                                                                                                                | -2.8 |
| YGR183C   | QCR9  | ubiquinol cytochrome c oxidoreductase complex 7.3 kDa subunit 9                                                                                                                           | -2.8 |
| YMR015C   | ERG5  | cytochrome P450 involved in C-22 denaturation of the ergosterol side-chain                                                                                                                | -2.8 |
| YDR516C   | EMI2  | Non-essential protein of unknown function required for transcriptional induction of the early meiotic-specific transcription factor IME1, also required for sporulation                   | -2.9 |

|           |            |                                                                                                                                                                                                                                         |      |
|-----------|------------|-----------------------------------------------------------------------------------------------------------------------------------------------------------------------------------------------------------------------------------------|------|
| YJL088W   | ARG3       | ornithine carbamoyltransferase                                                                                                                                                                                                          | -2.9 |
| YGL089C   | MF(ALPHA)2 | alpha mating factor                                                                                                                                                                                                                     | -2.9 |
| YNL111C   | CYB5       | cytochrome b5                                                                                                                                                                                                                           | -3.0 |
| YKR039W   | GAP1       | general amino acid permease                                                                                                                                                                                                             | -3.0 |
| YEL039C   | CYC7       | iso-2-cytochrome c                                                                                                                                                                                                                      | -3.0 |
| YNL015W   | PBI2       | proteinase inhibitor I2B (PBI2)                                                                                                                                                                                                         | -3.1 |
| YEL024W   | RIP1       | Rieske iron-sulfur protein of the mitochondrial cytochrome bc1 complex                                                                                                                                                                  | -3.1 |
| YPR124W   | CTR1       | copper transport protein                                                                                                                                                                                                                | -3.1 |
| YLR126C   |            | Putative protein of unknown function with similarity to glutamine amidotransferase proteins; has Aft1p-binding motif in the promoter; may be involved in copper and iron homeostasis; YLR126C is not an essential protein               | -3.3 |
| YDR461W   | MFA1       | a-factor mating pheromone precursor                                                                                                                                                                                                     | -3.3 |
| YHL040C   | ARN1       | Transporter, member of the ARN family of transporters that specifically recognize siderophore-iron chelates; responsible for uptake of iron bound to ferrirubin, ferrirhodin, and related siderophores                                  | -3.3 |
| YPL198W   | RPL7B      | ribosomal protein L7B (L6B) (rp11) (YL8)                                                                                                                                                                                                | -3.4 |
| YGL191W   | COX13      | cytochrome c oxidase subunit VIa may specifically interact with ATP                                                                                                                                                                     | -3.4 |
| YPR191W   | QCR2       | 40 kDa ubiquinol cytochrome-c reductase core protein 2                                                                                                                                                                                  | -3.4 |
| YGR087C   | PDC6       | pyruvate decarboxylase isozyme                                                                                                                                                                                                          | -3.6 |
| YEL065W   | SIT1       | ferrioxamine B permease                                                                                                                                                                                                                 | -3.6 |
| YGR234W   | YHB1       | Nitric oxide oxidoreductase, flavohemoglobin involved in nitric oxide detoxification; plays a role in the oxidative and nitrosative stress responses                                                                                    | -3.7 |
| YHL028W   | WSC4       | contains novel cysteine motif integral membrane protein (putative) similar to SLG1 (WSC1), WSC2 and WSC3                                                                                                                                | -3.8 |
| YNL237W   | YTP1       | Probable type-III integral membrane protein of unknown function, has regions of similarity to mitochondrial electron transport proteins                                                                                                 | -3.8 |
| YKR046C   | PET10      | Protein of unknown function that co-purifies with lipid particles; expression pattern suggests a role in respiratory growth; computational analysis of large-scale protein-protein interaction data suggests a role in ATP/ADP exchange | -4.0 |
| YNL052W   | COX5A      | cytochrome c oxidase chain Va                                                                                                                                                                                                           | -4.4 |
| YMR251W   | GTO3       | Putative cytosolic Omega class glutathione transferase                                                                                                                                                                                  | -4.5 |
| YDR270W   | CCC2       | copper-transporting P-type ATPase with similarity to human Menkes and Wilsons genes                                                                                                                                                     | -5.0 |
| YHR001W-A | QCR10      | ubiquinol-cytochrome c oxidoreductase complex 8.5 kDa subunit                                                                                                                                                                           | -5.2 |



|         |        |                                                                                                                                                                                           |       |
|---------|--------|-------------------------------------------------------------------------------------------------------------------------------------------------------------------------------------------|-------|
| YOR383C | FIT3   | Cell wall protein involved in iron transport                                                                                                                                              | -5.2  |
| YMR145C | NDE1   | Mitochondrial external NADH dehydrogenase, catalyzes the oxidation of cytosolic NADH; Nde1p and Nde2p are involved in providing the cytosolic NADH to the mitochondrial respiratory chain | -5.2  |
| YLR367W | RPS22B | ribosomal protein S22B (S24B) (rp50) (YS22)                                                                                                                                               | -5.6  |
| YNL142W | MEP2   | ammonia transport protein                                                                                                                                                                 | -5.8  |
| YLR205C | HMX1   | ER localized, heme-binding peroxidase involved in the degradation of heme; does not exhibit heme oxygenase activity despite similarity to heme oxygenases; expression regulated by AFT1   | -5.8  |
| YER145C | FTR1   | iron permease                                                                                                                                                                             | -6.0  |
| YLR136C | TIS11  | Zinc finger containing homolog of mammalian TIS11, glucose repressible gene                                                                                                               | -8.6  |
| YHL047C | ARN2   | triacylyfusarinine C transporter                                                                                                                                                          | -9.0  |
| YMR058W | FET3   | multicopper oxidase                                                                                                                                                                       | -11.0 |
| YGL187C | COX4   | cytochrome c oxidase subunit IV                                                                                                                                                           | -13.2 |
| YJR048W | CYC1   | iso-1-cytochrome c                                                                                                                                                                        | -13.3 |
| YOR382W | FIT2   | Cell wall protein involved in iron transport                                                                                                                                              | -14.3 |
