# Supplementary material
Source: PubMed Central journal article supplement (PMC2238161)
Supplement: eukcell_7_2_387__2.pdf [file eukcell_7_2_387__2.pdf]

**Supplemental Table 2. Gene Expression Responses to Sampangine in *C. albicans***

| <b>ORF</b> | <b>Gene symbol</b> | <b>Sc Ortholog</b> | <b>Description</b>                                                                                                     | <b>Fold Change</b> |
|------------|--------------------|--------------------|------------------------------------------------------------------------------------------------------------------------|--------------------|
| orf19.2048 |                    |                    | Transcription is positively regulated by Sfu1p                                                                         | 16.5               |
| orf19.7187 | CaMAM33            | MAM33              | Mitochondrial acidic matrix protein (by homology)                                                                      | 7.9                |
| orf19.822  | IPF8762            |                    | unknown function                                                                                                       | 5.9                |
| orf19.6898 | IPF2234            |                    | unknown function                                                                                                       | 5.2                |
| orf19.251  | IPF17186           | HSP31              | unknown function                                                                                                       | 4.8                |
| orf19.717  | CaHSP60            | HSP60              | Heat Shock Protein 60 (HSP60)                                                                                          | 4.4                |
| orf19.3656 | CaCOX15            | COX15              | cytochrome oxidase assembly factor (by homology)                                                                       | 4.4                |
| orf19.5025 | CaMET3             | MET3               | ATP sulfurylase                                                                                                        | 4.2                |
| orf19.2262 | IPF11105           | ZTA1               | probable quinone oxidoreductase                                                                                        | 4.1                |
| orf19.7325 | CaSCO1             | SCO1               | Inner mitochondrial membrane protein (by homology)                                                                     | 3.9                |
| orf19.2524 | CaMGE1             | MGE1               | heat shock protein (by homology)                                                                                       | 3.9                |
| orf19.7203 | CaMRP7             | MRP7               | Mitochondrial ribosomal protein Yml2 precursor (by homology)                                                           | 3.8                |
| orf19.828  | IPF8752            | MRPL24             | similar to <i>Saccharomyces cerevisiae</i> Mrpl24p ribosomal protein of the large subunit, mitochondrial (by homology) | 3.8                |
| orf19.3797 | CaMRPL11           | MRPL11             | Mitochondrial ribosomal protein (by homology)                                                                          | 3.7                |
| orf19.863  | CaMRPL35           | MRPL35             | Ribosomal protein of the large subunit, mitochondrial (by homology)                                                    | 3.7                |
| orf19.5161 | CaMRPL49           | MRPL49             | ribosomal protein mitochondrial                                                                                        | 3.5                |
| orf19.6402 | CaCYS3             | CYS3               | cystathionine gamma-lyase by homology                                                                                  | 3.5                |
| orf19.1662 | CaMRP1.3f          | MRP1               | Mitochondrial ribosomal protein of the small subunit, 3-prime end (by homology)                                        | 3.5                |
| orf19.2754 | CaTIM13            | TIM13              | subunit of mitochondrial protein import machinery-like by homology                                                     | 3.4                |
| orf19.5673 | CaOPT7             |                    | unknown function                                                                                                       | 3.4                |
| orf19.4018 | IPF3361            | RSM7               | putative mitochondrial ribosomal protein S7 (by homology)                                                              | 3.4                |
| orf19.5645 | CaMET15            | MET15              | O-acetylhomoserine O-acetylserine sulphhydrylase                                                                       | 3.3                |
| orf19.3367 |                    | MRPL22             | Predicted ORF in Assemblies 19 and 20                                                                                  | 3.3                |

|             |               |        |                                                                             |     |
|-------------|---------------|--------|-----------------------------------------------------------------------------|-----|
| orf19.3297  | IPF6223       | RSM27  | unknown function                                                            | 3.3 |
| orf19.4932  | CaMEF1        | MEF1   | mitochondrial translation elongation factor G (by homology)                 | 3.3 |
| orf19.6047  | CaTUF1        | TUF1   | Translation elongation factor TU (by homology)                              | 3.2 |
| orf19.7331  | CaFCY24       | FCY24  | Putative purine-cytosine transport protein                                  | 3.2 |
| orf19.7042  | IPF3080       |        | unknown function (by homology)                                              | 3.2 |
| orf19.7019  | CaYML6        | YML6   | Ribosomal protein, mitochondrial (by homology)                              | 3.2 |
| orf19.2275  | IPF10301      | MNP1   | putative 60S ribosomal protein L7/L12 homolog, mitochondrial precursor      | 3.2 |
| orf19.1896  | CaSSC1        | SSC1   | Mitochondrial heat shock protein 70-related protein (by homology)           | 3.2 |
| orf19.3559  | IPF3184.exon2 | MRPS35 | unknown function, exon 2                                                    | 3.2 |
| orf19.7577  | CaMSS51       | MSS51  | involved in maturation of COX1 and COB mRNA (by homology)                   | 3.1 |
| orf19.5759  | CaSNQ2        | SNQ2   | multidrug resistance protein (by homology)                                  | 3.1 |
| orf19.6565  | CaOXA1        | OXA1   | Cytochrome oxidase biogenesis protein (by homology)                         | 3.1 |
| orf19.397   | CaMRPL28      | MRPL28 | mitochondrial ribosomal protein of the large subunit (by homology)          | 3.1 |
| orf19.6420  | IPF1341       | PGA13  | Similarity to mucin proteins (by homology)                                  | 3.1 |
| orf19.4739  | CaMSS116      | MSS116 | RNA helicase of the DEAD box family (by homology)                           | 3.1 |
| orf19.6183  | IPF3445       | TIM8   | Unknown function                                                            | 3.1 |
| orf19.3205  | CaMRPL36      | MRPL36 | ribosomal protein YmL36 precursor, mitochondrial (by homology)              | 3.0 |
| orf19.7012  | CaLPA4        | LPA4   | Similar to ribosomal protein S16, mitochondrial (by homology)               | 3.0 |
| orf19.585   | CaMRPL17      | MRPL17 | ribosomal protein of the large subunit (YmL30), mitochondrial (by homology) | 3.0 |
| orf19.755   | CaMRPL37      | MRPL37 | Mitochondrial ribosomal protein YmL37 (by homology)                         | 3.0 |
| orf19.4190  | IPF7999       | TIM14  | unknown function                                                            | 2.9 |
| orf19.7485  | CaMRPL9       | MRPL9  | Mitochondrial ribosomal protein of the large subunit (by homology)          | 2.9 |
| orf19.1485  | CaMRPL31      | MRPL31 | Mitochondrial ribosomal protein                                             | 2.9 |
| orf19.6136  | IPF12778      | MRPL4  | ribosomal protein, mitochondrial (by homology)                              | 2.9 |
| orf19.10252 | CaSUL1        | SUL1   | High-affinity sulfate transport protein (by homology)                       | 2.8 |

|            |            |         |                                                                                                                        |     |
|------------|------------|---------|------------------------------------------------------------------------------------------------------------------------|-----|
| orf19.3480 | IPF17681   | RSM23   | similar to <i>Saccharomyces cerevisiae</i> Rsm23p involved in mitochondrial function (by homology)                     | 2.8 |
| orf19.688  | IPF9582    | MRPS18  | similar to <i>Saccharomyces cerevisiae</i> Mrps18p ribosomal protein of the small subunit, mitochondrial (by homology) | 2.8 |
| orf19.1300 | IPF13552   | OMS1    | putative methyltransferase (by homology)                                                                               | 2.8 |
| orf19.7386 | IPF3331    | MBA1    | unknown function                                                                                                       | 2.8 |
| orf19.125  | CaEBP1     | EBP1    | NADPH dehydrogenase                                                                                                    | 2.8 |
| orf19.3106 | CaMET16    | MET16   | 3 -phosphoadenylylsulfate reductase (by homology)                                                                      | 2.8 |
| orf19.2337 | CaALP1     | ALP1    | amino-acid permease (by homology)                                                                                      | 2.8 |
| orf19.5064 | CaMRPL3    | MRPL3   | ribosomal protein of the large subunit, mitochondrial (by homology)                                                    | 2.8 |
| orf19.3532 | CaMRPL10.3 | MRPL10  | ribosomal protein, 3-prime end (by homology)                                                                           | 2.7 |
| orf19.7514 | CaPCK1     | PCK1    | phosphoenolpyruvate carboxykinase                                                                                      | 2.7 |
| orf19.484  | CaMRPL40   | MRPL40  | Putative mitochondrial ribosomal protein (by homology)                                                                 | 2.7 |
| orf19.8604 | CaMRPS5    | MRPS5   | Probable ribosomal protein S5, mitochondrial (by homology)                                                             | 2.7 |
| orf19.3064 | CaMRPL27   | MRPL27  | ribosomal protein (by homology)                                                                                        | 2.7 |
| orf19.6853 | IPF8454    |         | unknown function                                                                                                       | 2.7 |
| orf19.549  | IPF4276    | MRPL32  | similar to <i>Saccharomyces cerevisiae</i> Mrpl32p putative mitochondrial ribosomal protein (by homology)              | 2.7 |
| orf19.2520 | CaMRPS28   | MRPS28  | ribosomal protein (by homology)                                                                                        | 2.7 |
| orf19.2214 | CaMRPL7    | MRPL7   | Ribosomal protein of the large subunit, mitochondrial (by homology)                                                    | 2.7 |
| orf19.5747 | CaMRP4     | MRP4    | Ribosomal protein of the small subunit mitochondrial (by homology)                                                     | 2.7 |
| orf19.989  |            | MRPS5   | Predicted ORF in Assemblies 19 and 20                                                                                  | 2.7 |
| orf19.1159 | IPF7616    |         | putative homoserine O-acetyltransferase (by homology)                                                                  | 2.7 |
| orf19.685  | CaYHM1     | GGC1    | Putative mitochondrial carrier protein; fungal-specific                                                                | 2.7 |
| orf19.4947 | IPF18761   | YPR098C | unknown function                                                                                                       | 2.7 |
| orf19.6406 | IPF1308    | SWS2    | Similarity to ribosomal protein S13 (by homology)                                                                      | 2.7 |
| orf19.5811 | CaMET1     | MET1    | siroheme synthase (by homology)                                                                                        | 2.7 |

|            |          |           |                                                                                                                  |     |
|------------|----------|-----------|------------------------------------------------------------------------------------------------------------------|-----|
| orf19.7050 | IPF447   | NOP15     | unknown function                                                                                                 | 2.6 |
| orf19.2039 | CaMSF1   | MSF1      | phenylalanine--tRNA ligase                                                                                       | 2.6 |
| orf19.7310 | IPF5981  | MSC1      | similar to <i>Saccharomyces cerevisiae</i> Gin3p (by homology)                                                   | 2.6 |
| orf19.3696 | CaTOM22  | TOM22     | mitochondrial outer membrane import receptor complex subunit (by homology)                                       | 2.6 |
| orf19.5201 | IPF7585  | RSM18     | unknown function                                                                                                 | 2.6 |
| orf19.5444 | CaTIM44  | TIM44     | mitochondrial inner membrane import receptor                                                                     | 2.6 |
| orf19.5282 | IPF4696  |           | unknown Function                                                                                                 | 2.6 |
| orf19.6208 | CaMEF2   | MEF2      | translation elongation factor (by homology)                                                                      | 2.6 |
| orf19.336  | IPF1537  | YAH1      | putative adrenodoxin and ferredoxin (by homolgy)                                                                 | 2.6 |
| orf19.1416 | CaCOX11  | COX11     | cytochrome-c oxidase assembly protein by homology to <i>S. cerevisiae</i>                                        | 2.5 |
| orf19.7603 | IPF660   | YMR244C-A | unknown function                                                                                                 | 2.5 |
| orf19.51   | IPF11177 | CLU1      | similar to <i>Saccharomyces cerevisiae</i> Clu1p translation initiation factor eIF3 (p135 subunit) (by homology) | 2.5 |
| orf19.1162 | IPF13081 |           | unknown function                                                                                                 | 2.5 |
| orf19.6129 | CaMRPL8  | MRPL8     | mitochondrial 60s ribosomal subunit (by homology)                                                                | 2.5 |
| orf19.4176 | IPF6175  | MRPS17    | unknown function                                                                                                 | 2.5 |
| orf19.4056 | IPF7666  | GAT2      | unknown function                                                                                                 | 2.5 |
| orf19.3167 | IPF3174  | COX10     | Farnesyl transferase (by homology)                                                                               | 2.5 |
| orf19.5515 | CaCBP3   | CBP3      | involved in cytochrome-c reductase assembly (by homology)                                                        | 2.4 |
| orf19.4273 | IPF16549 |           | Unknown function                                                                                                 | 2.4 |
| orf19.2533 | CaPRS    | YER087W   | prolyl-tRNA synthetase, 3-prime end                                                                              | 2.4 |
| orf19.498  | CaNAM9   | NAM9      | mitochondrial ribosomal protein                                                                                  | 2.4 |
| orf19.6696 | CaTIM9   | TIM9      | Mitochondrial inner membrane translocase (by homology)                                                           | 2.4 |
| orf19.4309 | CaGRP2   | GRP2      | Reductase (by homology)                                                                                          | 2.4 |
| orf19.2639 | IPF6970  |           | unknown function                                                                                                 | 2.4 |
| orf19.6503 | IPF3928  |           | unknown function                                                                                                 | 2.4 |

|             |            |         |                                                                                                                       |     |
|-------------|------------|---------|-----------------------------------------------------------------------------------------------------------------------|-----|
| orf19.7665  | IPF4935    | COX16   | unknown function                                                                                                      | 2.4 |
| orf19.2803  | CaHEM13    | HEM13   | by homology <i>S. cerev.</i> : coproporphyrinogen III oxidase                                                         | 2.3 |
| orf19.5610  | IPF13176.3 | ARG3    | ornithine carbamoyltransferase, 3-prime end (by homology)                                                             | 2.3 |
| orf19.1545  | IPF6505    | MRPS8   | unknown function                                                                                                      | 2.3 |
| orf19.6515  | CaHSP90    | HSP90   | heat shock protein                                                                                                    | 2.3 |
| orf19.5279  | IPF4703    | MRPL51  | unknown Function                                                                                                      | 2.3 |
| orf19.439   | IPF5933    | MHR1    | similar to <i>Saccharomyces cerevisiae</i> Mhr1p involved in mitochondrial homologous DNA recombination (by homology) | 2.3 |
| orf19.4099  | CaECM17    | ECM17   | Putative sulfite reductase (by homology)                                                                              | 2.3 |
| orf19.6524  | CaTOM40    | TOM40   | mitochondrial import receptor chain TOM40 (by homology)                                                               | 2.3 |
| orf19.1151  | IPF11713   |         | unknown function                                                                                                      | 2.3 |
| orf19.4980  | CaSSA4     | SSA4    | cahsp70 mRNA for heat shock                                                                                           | 2.3 |
| orf19.9512  | CaCYC3     | CYC3    | cytochrome C heme lyase                                                                                               | 2.3 |
| orf19.12536 | IPF12312   |         | unknown function                                                                                                      | 2.3 |
| orf19.4536  | CaCYS4     | CYS4    | cystathionine beta-synthase (by homology)                                                                             | 2.3 |
| orf19.3026  | CaMAS1     | MAS1    | Mitochondrial processing protease (by homology)                                                                       | 2.2 |
| orf19.3577  | CaCOQ5     | COQ5    | C-methyltransferase (by homology)                                                                                     | 2.2 |
| orf19.5420  | CaRML2     | RML2    | Ribosomal L2 protein, mitochondrial (by homology)                                                                     | 2.2 |
| orf19.1149  | CaMRF1     | MRF1    | mitochondrial respiratory function protein (by homology)                                                              | 2.2 |
| orf19.5288  | CaIFE2     | IFE2    | Unknown function                                                                                                      | 2.2 |
| orf19.1967  | CaIMG1     | IMG1    | Ribosomal protein, mitochondrial (by homology)                                                                        | 2.2 |
| orf19.4022  | CaSDH42    | SDH42   | succinate dehydrogenase membrane anchor subunit for sdh2p (by homology)                                               | 2.2 |
| orf19.9664  |            | NAT2    | Predicted ORF in Assemblies 19 and 20                                                                                 | 2.2 |
| orf19.946   | CaMET14    | MET14   | Adenylylsulfate kinase (by homology)                                                                                  | 2.2 |
| orf19.7306  | IPF5987    | YPR127W | unknown function                                                                                                      | 2.2 |

|             |          |         |                                                                                                                                                |     |
|-------------|----------|---------|------------------------------------------------------------------------------------------------------------------------------------------------|-----|
| orf19.240   | IPF10510 | PAM17   | unknown function                                                                                                                               | 2.2 |
| orf19.3795  | CaAGP3   | AGP3    | amino acid-permease (by homology)                                                                                                              | 2.2 |
| orf19.3350  | IPF4814  | MRP20   | similar to <i>Saccharomyces cerevisiae</i> Mrp20p ribosomal protein of the large subunit, mitochondrial (by homology)                          | 2.2 |
| orf19.2244  | IPF12897 | YJR096W | putative oxidoreductase (by homology)                                                                                                          | 2.2 |
| orf19.1352  | CaTIM22  | TIM22   | Mitochondrial import inner membrane translocase subunit (by homology)                                                                          | 2.2 |
| orf19.6041  | CaRPO41  | RPO41   | Mitochondrial DNA-directed RNA polymerase (by homology)                                                                                        | 2.2 |
| orf19.2382  | CaISM1   | ISM1    | isoleucyl-tRNA synthetase (by homology)                                                                                                        | 2.2 |
| orf19.1862  | IPF4065  | YHR087W | unknown function                                                                                                                               | 2.2 |
| orf19.1528  | CaMTF1   | MTF1    | RNA polymerase specific factor, mitochondrial (by homology)                                                                                    | 2.2 |
| orf19.6656  | IPF2277  | DUR3    | unknown function                                                                                                                               | 2.2 |
| orf19.6062  | IPF1415  | YPL098C | unknown function                                                                                                                               | 2.1 |
| orf19.6672  | CaMDJ1   | MDJ1    | Heat shock protein - chaperone (by homology)                                                                                                   | 2.1 |
| orf19.5167  | CaIFM1   | IFM1    | translation initiation factor 2 by homology                                                                                                    | 2.1 |
| orf19.1617  |          | YDR282C | Protein similar to <i>S. cerevisiae</i> Ydr282cp; transposon mutation affects filamentous growth                                               | 2.1 |
| orf19.1201  | IPF7165  | DIA4    | similar to <i>Saccharomyces cerevisiae</i> Dia4p seryl-tRNA synthetase (by homology)                                                           | 2.1 |
| orf19.5684  | CaMRPL38 | MRPL38  | ribosomal protein of the large subunit(L14), mitochondrial, by homology                                                                        | 2.1 |
| orf19.1483  | IPF4406  | YKL137W | unknown function                                                                                                                               | 2.1 |
| orf19.3301  | IPF19802 | MET30   | similar to <i>Saccharomyces cerevisiae</i> Met30p involved in regulation of sulfur assimilation genes and cell cycle progression (by homology) | 2.1 |
| orf19.12214 | IPF16405 | RSM25   | similar to <i>saccharomyces cerevisiae</i> Rsm25p protein of the small subunit of the mitochondrial ribosome (by homology)                     | 2.1 |
| orf19.2737  | IPF9167  | YDR109C | unknown function                                                                                                                               | 2.1 |
| orf19.5230  | CaMRPS9  | MRPS9   | ribosomal protein S9 small subunit precursor                                                                                                   | 2.1 |
| orf19.458   | CaBCS1   | BCS1    | mitochondrial protein of the CDC48/PAS1/SEC18 (AAA) family of ATPases (by homology)                                                            | 2.1 |
| orf19.392   | CaCBP4   | CBP4    | Ubiquinol--cytochrome-c reductase assembly factor (by homology)                                                                                | 2.1 |
| orf19.62    | IPF19484 | TMA108  | putative zinc amino peptidase (by homology)                                                                                                    | 2.1 |

|            |          |       |                                                                                                                         |      |
|------------|----------|-------|-------------------------------------------------------------------------------------------------------------------------|------|
| orf19.5443 | IPF4191  | BNA4  | unknown function                                                                                                        | 2.1  |
| orf19.5698 | IPF5446  | MRPL1 | putative ribosomal protein (by homology)                                                                                | 2.1  |
| orf19.4076 | CaMET10  | MET10 | Sulfite reductase flavin-binding subunit (by homology)                                                                  | 2.1  |
| orf19.760  | IPF3903  |       | unknown function                                                                                                        | 2.1  |
| orf19.150  | IPF16036 | TIM17 | similar to <i>Saccharomyces cerevisiae</i> Tim17p mitochondrial inner membrane import translocase subunit (by homology) | 2.1  |
| orf19.2020 | CaHXT61  | HXT61 | sugar transporter                                                                                                       | 2.1  |
| orf19.4023 | IPF3366  | MRP2  | Mitochondrial ribosomal protein (by homology)                                                                           | 2.0  |
| orf19.1956 | IPF14757 |       | unknown function                                                                                                        | 2.0  |
| orf19.2259 | IPF16143 |       | unknown function                                                                                                        | 2.0  |
| orf19.6752 | IPF3492  | RSM10 | unknown function                                                                                                        | 2.0  |
| orf19.445  | IPF5924  |       | unknown function                                                                                                        | 2.0  |
| orf19.1977 | CaURA4   | URA4  | dihydroorotase (by homology)                                                                                            | 2.0  |
| orf19.1857 | IPF4684  |       | unknown Function                                                                                                        | -2.0 |
| orf19.3731 | CaERG25  | ERG25 | C-4 sterol methyl oxidase                                                                                               | -2.0 |
| orf19.797  | CaBAT21  | BAT21 | branched-chain amino acid transaminase (by homology)                                                                    | -2.0 |
| orf19.5293 | IPF11879 |       | unknown function                                                                                                        | -2.0 |
| orf19.1108 | CaHAM1   | HAM1  | Controls 6-N-hydroxylaminopurine sensitivity and mutagenesis (by homology)                                              | -2.1 |
| orf19.3591 | CaAPE3   | APE3  | aminopeptidase (by homology)                                                                                            | -2.1 |
| orf19.2179 | CaSIT1   | SIT1  | Ferrioxamine B permease by homology                                                                                     | -2.1 |
| orf19.6899 | IPF2232  |       | unknown function                                                                                                        | -2.1 |
| orf19.5294 | CaPDB1   | PDB1  | pyruvate dehydrogenase (by homology)                                                                                    | -2.1 |
| orf19.6985 | CaTEA1   | TEA1  | Putative transcription factor with zinc cluster DNA-binding motif; has similarity to <i>S. cerevisiae</i> Tea1p         | -2.1 |
| orf19.276  | IPF10124 |       | Alcohol acetyltransferase (by homology)                                                                                 | -2.2 |
| orf19.4853 | IPF7732  | HCM1  | similar to <i>Saccharomyces cerevisiae</i> Hcm1p transcription factor with fork head domain (by homology)               | -2.2 |

|            |            |       |                                                                                                                                                                                                                                            |      |
|------------|------------|-------|--------------------------------------------------------------------------------------------------------------------------------------------------------------------------------------------------------------------------------------------|------|
| orf19.907  | CaFEN12    |       | Predicted ORF from Assemblies 19 and 20; amphotericin B, caspofungin repressed                                                                                                                                                             | -2.3 |
| orf19.3142 | IPF3259    |       | unknown function                                                                                                                                                                                                                           | -2.3 |
| orf19.6586 | IPF1617    |       | unknown function                                                                                                                                                                                                                           | -2.3 |
| orf19.3249 | CaLAG1     | LAG1  | longevity-assurance protein (by homology)                                                                                                                                                                                                  | -2.3 |
| orf19.6570 | IPF1651    |       | purine nucleoside permease (by homology)                                                                                                                                                                                                   | -2.3 |
| orf19.1168 | CaZCF3     |       | Predicted zinc-finger protein of unknown function                                                                                                                                                                                          | -2.4 |
| orf19.1631 | CaERG6     | ERG6  | sterol transmethylase                                                                                                                                                                                                                      | -2.5 |
| orf19.781  | CaDUR31    | DUR31 | Urea transport protein (by homology)                                                                                                                                                                                                       | -2.5 |
| orf19.4802 | CaFTH1     | FTH1  | iron transporter                                                                                                                                                                                                                           | -2.5 |
| orf19.4966 | IPF16755   | AGC1  | unknown function                                                                                                                                                                                                                           | -2.5 |
| orf19.5660 | CaPEX10.3  | PEX10 | peroxisomal assembly protein, 3-prime end (by homology)                                                                                                                                                                                    | -2.5 |
| orf19.6993 | CaGAP2     | GAP2  | general amino acid permease (by homology)                                                                                                                                                                                                  | -2.6 |
| orf19.7585 | CaINO1     | INO1  | myo-inositol-1-phosphate synthase                                                                                                                                                                                                          | -2.6 |
| orf19.6073 | CaHMX1     | HMX1  | Heme oxygenase; acts in utilization of heme iron; gene transcriptionally activated by heat, low iron, or heme; negatively regulated by Efg1p; expression greater in low iron; upregulated by Rim101p at pH 8                               | -2.9 |
| orf19.3121 | IPF12303   |       | glutathione-S-transferase (by homology)                                                                                                                                                                                                    | -2.9 |
| orf19.4556 | CaALS12.3f | ALS12 | agglutinin-like protein, 3-prime end                                                                                                                                                                                                       | -3.1 |
| orf19.2602 | CaOPT1     | OPT1  | oligopeptide transporter                                                                                                                                                                                                                   | -3.2 |
| orf19.2591 | CaBIO3     | BIO3  | DAPA aminotransferase (by homology)                                                                                                                                                                                                        | -3.4 |
| orf19.2593 | CaBIO2     | BIO2  | biotin synthetase (by homology)                                                                                                                                                                                                            | -3.5 |
| orf19.5672 | CaMEP2     | MEP2  | high affinity low capacity ammonia (by homology)                                                                                                                                                                                           | -3.7 |
| orf19.2397 | IPF14040   |       | probable transporter (by homology)                                                                                                                                                                                                         | -4.2 |
| orf19.5636 | CaRBT5     | RBT5  | GPI-anchored cell wall protein; has CRoW motif, not required for filamentous growth; expression is regulated by Rfg1p, Rim101p; repressed by Sfu1p, Hog1p, Tup1p; induced by serum, iron, alkaline pH, ketoconazole, or ciclopirox olamine | -4.5 |
